# Supplementary material
Source: PubMed Central journal article supplement (PMC4631262)
Supplement: NIHMS649197-supplement-supplement_1.pdf [file NIHMS649197-supplement-supplement_1.pdf]

**Supplementary Table 1.** Body/Liver/Fat Weight and Lipid Level in WT, TLR9<sup>-/-</sup>, IL-1R<sup>-/-</sup>, and MyD88<sup>-/-</sup> Mice at 22 Weeks After Standard, CSAA and CDAA Diet Feeding

|                                      | WT                       |                           |                             | TLR9 <sup>-/-</sup>      |                             |                            |
|--------------------------------------|--------------------------|---------------------------|-----------------------------|--------------------------|-----------------------------|----------------------------|
|                                      | Standard chow<br>(n = 6) | CSAA diet<br>(n = 5)      | CDAA diet<br>(n = 8)        | Standard chow<br>(n = 4) | CSAA diet<br>(n = 4)        | CDAA diet<br>(n = 8)       |
| Body weight at week 0 (g)            | 24.2 ± 0.75              | 22.4 ± 0.89               | 23.2 ± 1.60                 | 23.8 ± 0.96              | 25.0 ± 0.82 <sup>a</sup>    | 24.4 ± 0.98 <sup>a</sup>   |
| Body weight at week 22 (g)           | 30.8 ± 0.5               | 41.5 ± 2.22 <sup>b</sup>  | 40.1 ± 2.76 <sup>b</sup>    | 26.8 ± 1.18              | 31.5 ± 2.07 <sup>a,b</sup>  | 28.2 ± 3.34 <sup>a</sup>   |
| Liver weight (g)                     | 1.34 ± 0.16              | 2.40 ± 0.40 <sup>b</sup>  | 2.48 ± 0.41 <sup>b</sup>    | 1.11 ± 0.09 <sup>a</sup> | 1.31 ± 0.33 <sup>a</sup>    | 1.23 ± 0.29 <sup>a</sup>   |
| Liver weight (%)                     | 4.38 ± 0.49              | 5.75 ± 0.69 <sup>b</sup>  | 6.17 ± 0.68 <sup>b</sup>    | 4.13 ± 0.19              | 4.14 ± 0.79 <sup>a</sup>    | 4.31 ± 0.58 <sup>a</sup>   |
| Epididymal fat (g)                   | 0.74 ± 0.36              | 2.59 ± 0.35 <sup>b</sup>  | 2.47 ± 0.33 <sup>b</sup>    | 0.51 ± 0.09              | 1.08 ± 0.16 <sup>a,b</sup>  | 0.89 ± 0.37 <sup>a,b</sup> |
| Epididymal fat (%)                   | 2.29 ± 0.84              | 6.21 ± 0.58 <sup>b</sup>  | 6.17 ± 0.81 <sup>b</sup>    | 1.90 ± 0.26              | 3.43 ± 0.33 <sup>a,b</sup>  | 3.05 ± 1.00 <sup>a,b</sup> |
| Plasma                               |                          |                           |                             |                          |                             |                            |
| T-Bil (mg/mL)                        | 0.85 ± 0.66              | 0.90 ± 0.22               | 1.19 ± 1.23                 | 0.77 ± 0.21              | 0.58 ± 0.34                 | 0.76 ± 0.40                |
| ALT (U/L)                            | 24.7 ± 6.25              | 44.0 ± 10.7 <sup>b</sup>  | 122.0 ± 29.0 <sup>b,c</sup> | 13.0 ± 4.36 <sup>a</sup> | 32.0 ± 13.3                 | 41.1 ± 16.2 <sup>a,b</sup> |
| ALP (U/L)                            | 118.2 ± 8.78             | 133.3 ± 12.2              | 165.9 ± 57.9                | 125.4 ± 16.6             | 126.0 ± 13.6                | 162.9 ± 30.8 <sup>c</sup>  |
| Triglyceride (mg/dL)                 | 30.8 ± 0.92              | 43.1 ± 13.4               | 67.3 ± 5.85 <sup>b,c</sup>  | 22.4 ± 0.69 <sup>a</sup> | 24.0 ± 3.15                 | 23.2 ± 9.33 <sup>a</sup>   |
| Total cholesterol (mg/dL)            | 66.4 ± 13.5              | 161.2 ± 22.9 <sup>b</sup> | 107.2 ± 25.0 <sup>b,c</sup> | 54.2 ± 4.26              | 151.5 ± 12.3 <sup>a,b</sup> | 70.3 ± 32.0 <sup>c</sup>   |
| Free fatty acid (mmol/L)             | 0.29 ± 0.07              | 0.29 ± 0.12               | 0.30 ± 0.06                 | 0.42 ± 0.05              | 0.35 ± 0.22 <sup>a</sup>    | 0.43 ± 0.26                |
| Liver                                |                          |                           |                             |                          |                             |                            |
| Triglyceride (mg/g liver)            | 31.0 ± 10.3              | 87.3 ± 19.9 <sup>b</sup>  | 163 ± 12.2 <sup>b,c</sup>   | 28.0 ± 1.42              | 63.2 ± 9.52 <sup>b</sup>    | 83.1 ± 28.5 <sup>a</sup>   |
| Total cholesterol (mg/g liver)       | 4.13 ± 2.40              | 25.5 ± 2.22 <sup>b</sup>  | 25.9 ± 3.29 <sup>b</sup>    | 2.11 ± 1.00              | 8.39 ± 1.46 <sup>b</sup>    | 9.84 ± 4.67 <sup>a</sup>   |
| Free fatty acid ( $\mu$ mol/g liver) | 0.56 ± 0.07              | 2.61 ± 0.17 <sup>b</sup>  | 2.70 ± 0.20 <sup>b</sup>    | 0.36 ± 0.33              | 0.69 ± 0.10                 | 0.76 ± 0.11 <sup>a</sup>   |

Note: Values are mean ± SD.

<sup>a</sup>Significantly different from WT,  $P < .05$ .

<sup>b</sup>Significantly different from standard chow,  $P < .05$ .

<sup>c</sup>Significantly different from CSAA,  $P < .05$ .

**Supplementary Table 1.** Continued

| IL-1R <sup>-/-</sup>      |                             |                              | MyD88 <sup>-/-</sup>     |                             |                              |
|---------------------------|-----------------------------|------------------------------|--------------------------|-----------------------------|------------------------------|
| Standard chow<br>(n = 4)  | CSAA diet<br>(n = 4)        | CDAA diet<br>(n = 8)         | Standard chow<br>(n = 4) | CSAA diet<br>(n = 4)        | CDAA diet<br>(n = 7)         |
| 25.0 ± 1.00               | 25.0 ± 0.01 <sup>a</sup>    | 24.9 ± 0.90                  | 25.5 ± 0.71              | 25.0 ± 0.01 <sup>a</sup>    | 24.6 ± 1.94                  |
| 26.0 ± 0.77               | 32.0 ± 0.57 <sup>a,b</sup>  | 38.4 ± 5.83 <sup>b,c</sup>   | 25.7 ± 0.94              | 30.2 ± 5.42 <sup>a</sup>    | 36.8 ± 4.20 <sup>b</sup>     |
| 1.18 ± 0.07               | 1.50 ± 0.15 <sup>a,b</sup>  | 2.23 ± 0.61 <sup>b,c</sup>   | 0.96 ± 0.09 <sup>a</sup> | 1.35 ± 0.14 <sup>a,b</sup>  | 2.03 ± 0.58 <sup>b,c</sup>   |
| 4.53 ± 0.22               | 4.67 ± 0.46 <sup>a</sup>    | 5.72 ± 0.84 <sup>b,c</sup>   | 3.75 ± 0.20 <sup>a</sup> | 4.51 ± 0.34 <sup>a,b</sup>  | 5.44 ± 1.02 <sup>b,c</sup>   |
| 0.29 ± 0.16 <sup>a</sup>  | 1.30 ± 0.06 <sup>a,b</sup>  | 1.80 ± 0.71 <sup>b</sup>     | 0.20 ± 0.07 <sup>a</sup> | 1.05 ± 0.72 <sup>a,b</sup>  | 1.59 ± 0.65 <sup>a,b</sup>   |
| 1.10 ± 0.61 <sup>a</sup>  | 4.06 ± 0.18 <sup>a,b</sup>  | 4.55 ± 1.41 <sup>a,b</sup>   | 0.80 ± 0.04 <sup>a</sup> | 3.32 ± 1.79 <sup>a</sup>    | 4.19 ± 1.36 <sup>a,b</sup>   |
| 0.86 ± 0.20               | 0.90 ± 0.17                 | 1.05 ± 0.56                  | 1.01 ± 0.03              | 1.04 ± 0.42                 | 1.16 ± 0.51                  |
| 28.0 ± 7.21               | 39.3 ± 8.74                 | 59.9 ± 14.5 <sup>a,b,c</sup> | 23.0 ± 2.83              | 28.7 ± 7.37 <sup>a</sup>    | 41.6 ± 6.21 <sup>a,b,c</sup> |
| 103.0 ± 8.90 <sup>a</sup> | 157.5 ± 66.2                | 214.8 ± 96.2 <sup>b</sup>    | 170.2 ± 53.2             | 180.1 ± 63.7                | 219.2 ± 27.9 <sup>a</sup>    |
| 22.9 ± 9.15               | 21.3 ± 4.08 <sup>a</sup>    | 21.8 ± 9.24 <sup>a</sup>     | 29.3 ± 3.84              | 17.7 ± 6.82 <sup>a,b</sup>  | 41.4 ± 8.86 <sup>a,b,c</sup> |
| 55.2 ± 12.6               | 102.9 ± 0.59 <sup>a,b</sup> | 68.6 ± 17.9 <sup>a,c</sup>   | 59.7 ± 11.4              | 113.5 ± 4.32 <sup>a,b</sup> | 74.6 ± 14.9 <sup>a,c</sup>   |
| 0.32 ± 0.06               | 0.59 ± 0.01 <sup>a,b</sup>  | 0.27 ± 0.08 <sup>c</sup>     | 0.35 ± 0.07              | 0.23 ± 0.02 <sup>b</sup>    | 0.20 ± 0.06 <sup>a,b</sup>   |
| 35.6 ± 3.43               | 55.0 ± 14.0 <sup>a,b</sup>  | 84.4 ± 10.9 <sup>a,b,c</sup> | 34.9 ± 4.05              | 46.7 ± 1.58 <sup>a,b</sup>  | 60.7 ± 39.2 <sup>a</sup>     |
| 3.07 ± 0.36               | 5.31 ± 0.23 <sup>a,b</sup>  | 6.74 ± 1.40 <sup>a,b</sup>   | 1.97 ± 0.11              | 5.69 ± 0.22 <sup>a,b</sup>  | 5.12 ± 2.73 <sup>a</sup>     |
| 0.60 ± 0.04               | 0.92 ± 0.56                 | 1.07 ± 0.56 <sup>a</sup>     | 0.35 ± 0.02 <sup>a</sup> | 0.56 ± 0.19                 | 0.69 ± 0.33 <sup>a</sup>     |

**Supplementary Table 2.** Energy Composition of Standard, CSAA, and CDAA Diets

|                                 | Standard chow | CSAA diet | CDAA diet |
|---------------------------------|---------------|-----------|-----------|
| Total calorie ( <i>kcal/g</i> ) | 3.41          | 4.27      | 4.33      |
| Carbohydrates (%)               | 62.1          | 63.2      | 68.5      |
| Protein (%)                     | 24.6          | 20.1      | 17.4      |
| Fat (%)                         | 13.2          | 16.2      | 14.0      |

**Supplementary Table 3.** Sequence of Primers Used for Real-Time Quantitative PCR

| Gene                    | Forward                   | Reverse                |
|-------------------------|---------------------------|------------------------|
| 18S                     | AGTCCCTGCCCTTTGTACACA     | CGATCCGAGGGCCTCACTA    |
| Bambi                   | TGAGCAGCATCACAGTAGCA      | CGCCACTCCAGCTACTTCTT   |
| Bcl2                    | CTTTCTGCTTTTTATTTTCATGAGG | CAGAAGATCATGCCGTCCTT   |
| Bax                     | GATCAGCTCGGGCACTTTAG      | TTGCTGATGGCAACTTCAAC   |
| DGAT1                   | TCACCACACACCAATTCAGG      | GACGGCTACTGGGATCTGA    |
| DGAT2                   | GAAGATGTCTGGAGGGCTG       | CGCAGCGAAAACAAGAATAA   |
| Collagen $\alpha$ 1(I)  | TAGGCCATTGTGTATGCAGC      | ACATGTTACAGCTTTGTGGACC |
| Collagen $\alpha$ 1(IV) | CACATTTCCACAGCCAGAG       | GTCTGGCTTCTGCTGCTCTT   |
| IL-1 $\alpha$           | CCAGAAGAAAATGAGGTCGG      | AGCGCTCAAGGAGAAGACC    |
| IL-1 $\beta$            | GGTCAAAGGTTTGGAAAGCAG     | TGTGAAATGCCACCTTTTGA   |
| IL-6                    | ACCAGAGGAAATTTCAATAGGC    | TGATGCACTTGACAGAAAACA  |
| PAI-1                   | GCCAGGGTTGCACTAAACAT      | GCCTCCTCATCCTGCCTAA    |
| TGF $\beta$ 1           | GTGGAATCAACGGGATCAG       | ACTTCCAACCCAGGTCTTTC   |
| TIMP1                   | AGGTGGTCTCGTTGATTCT       | GTAAGGCCTGTAGCTGTGCC   |
| TNF $\alpha$            | AGGGTCTGGGCCATAGAAT       | CCACCACGCTCTTCTGTCTAC  |

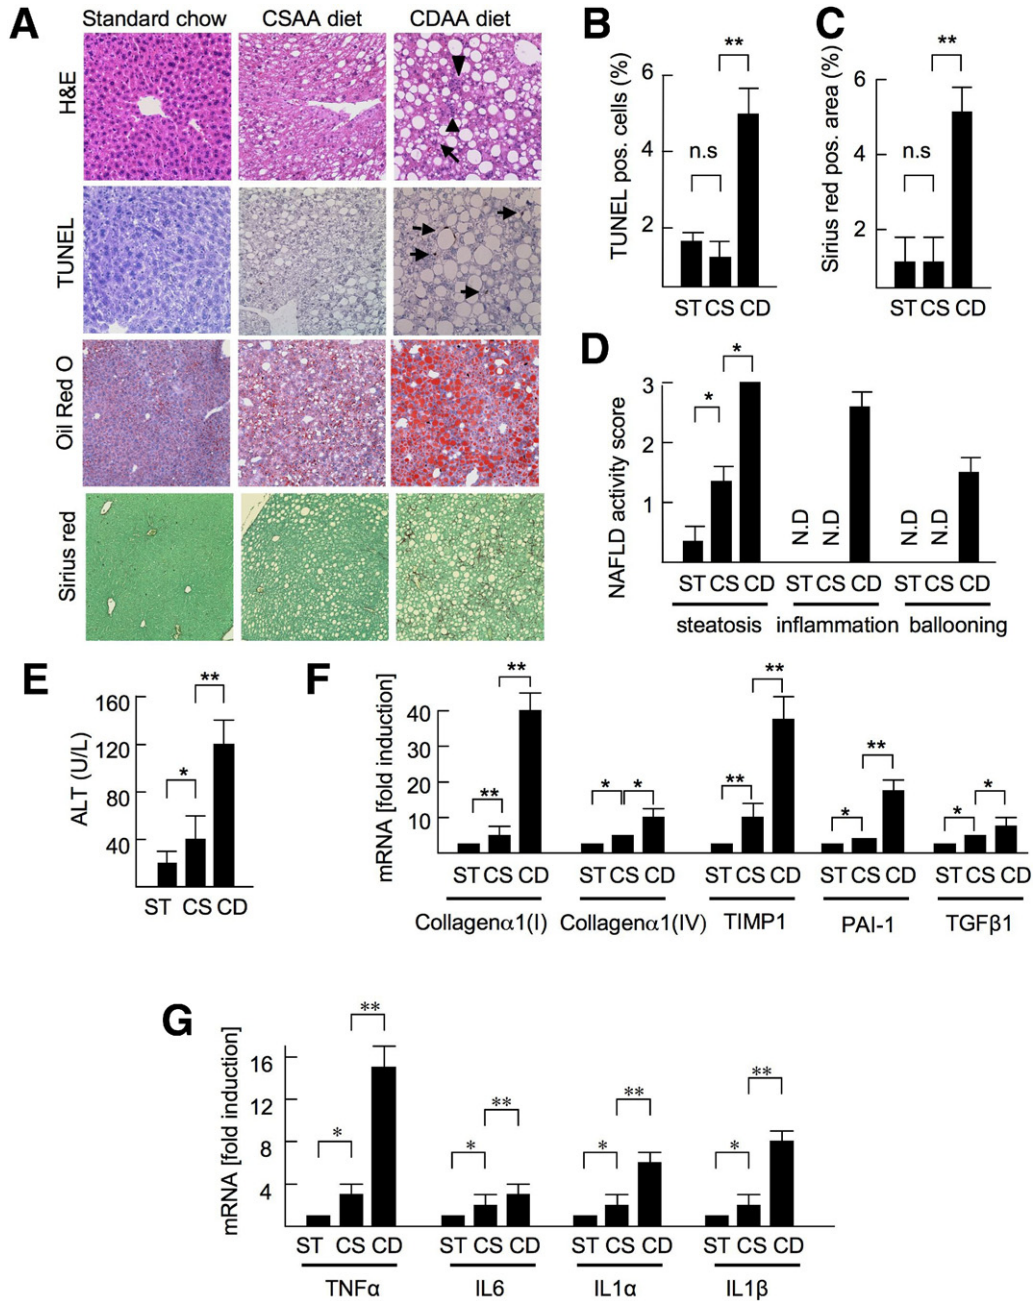

**Supplementary Figure 1.** CDAA diet-induced steatohepatitis mimics human NASH. WT mice were fed standard chow (ST, n = 6), CSAA (CS, n = 4), and CDAA (CD, n = 5) diets for 22 weeks. (A) Liver sections were stained with H&E, Oil Red O, TUNEL, and Sirius Red. Inflammatory cell infiltration (*arrowheads*) and ballooning hepatocytes (*arrow*) are seen in the CDAA diet group by H&E staining. *Arrows* indicate apoptotic cells in TUNEL staining. Perisinusoidal fibrosis is seen in the CDAA group by Sirius red staining. Original magnification,  $\times 200$  for H&E and TUNEL,  $\times 100$  for Oil Red O and Sirius red staining. (B) Number of TUNEL-positive cells, (C) Sirius red-positive area, and (D) NAFLD activity score were calculated. N.D., not detected. (E) Serum ALT level. (F) Hepatic mRNA levels of profibrogenic markers were determined by quantitative real-time PCR. Genes were normalized to 18S RNA as an internal control. Data represent mean  $\pm$  SD; \* $P$  < .05, \*\* $P$  < .01; n.s., not significant.

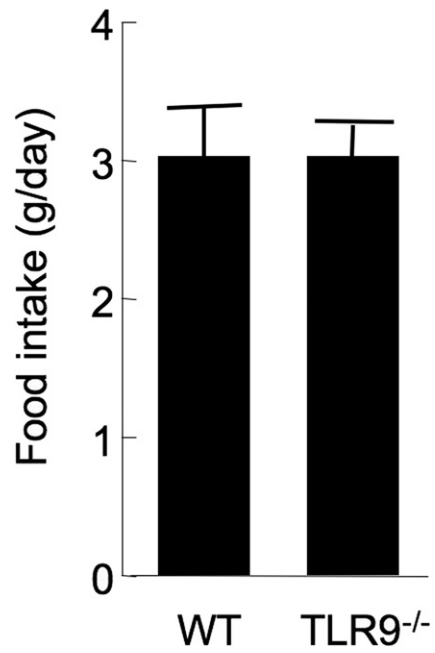

**Supplementary Figure 2.** Comparable food intake in WT and TLR9<sup>-/-</sup> mice. A CDAA diet intake was measured on WT and TLR9<sup>-/-</sup> mice.

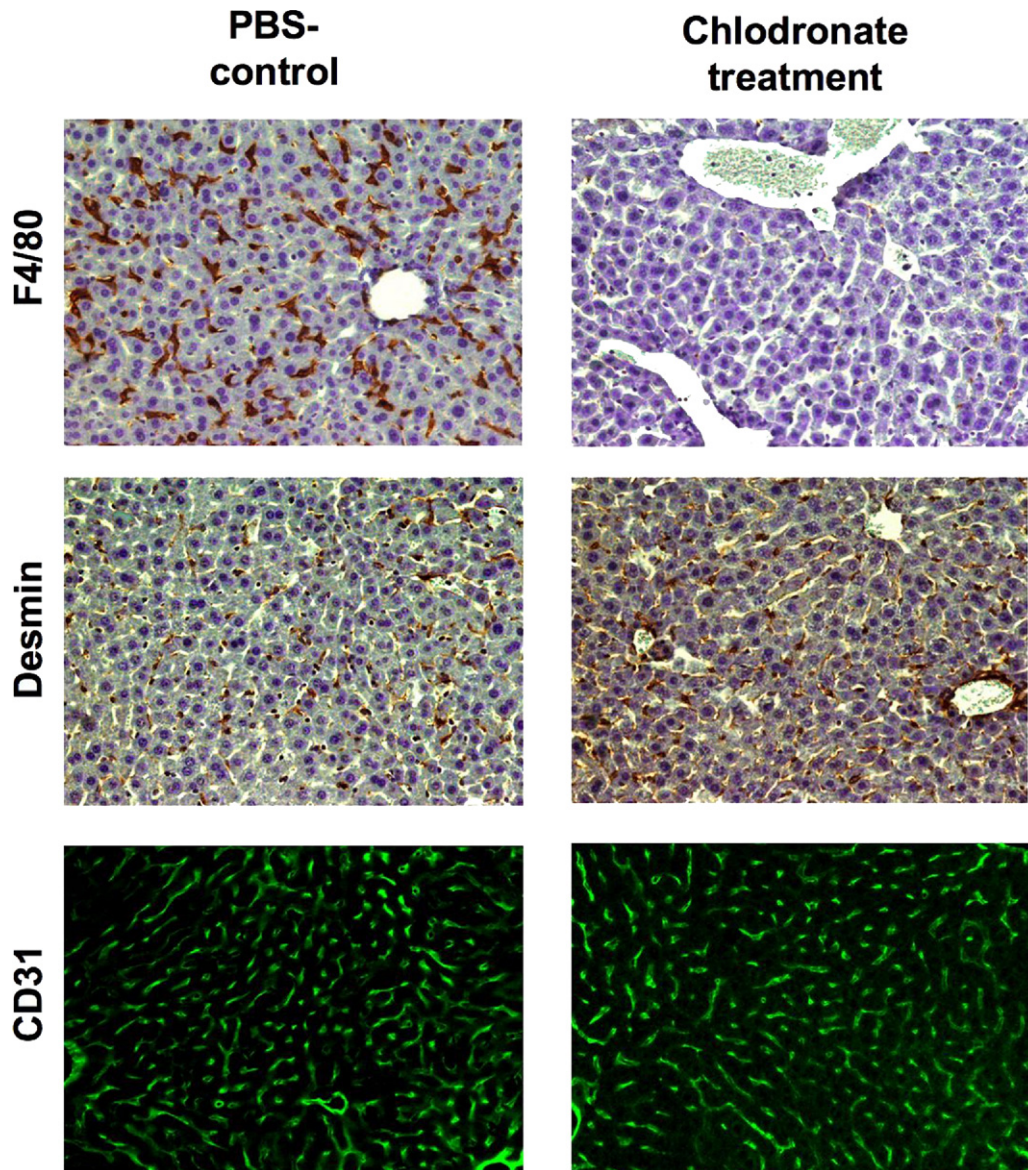

**Supplementary Figure 3.** Specific deletion of Kupffer cells, but not HSCs and sinusoidal endothelial cells, by liposomal clodronate treatment. (A and B) Liver samples were harvested 24 hours after the injection of liposomal clodronate. Kupffer cells, HSCs, sinusoidal endothelial cells were determined by immunohistochemistry for F4/80 (A), desmin (B), and CD31 (C). Liposomal clodronate injection completely depleted Kupffer cells, but it did not influence the number of HSCs and sinusoidal endothelial cells.

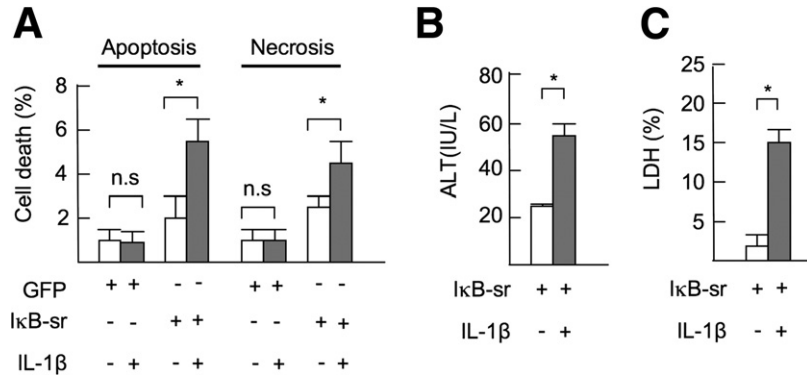

**Supplementary Figure 4.** Inhibition of NF- $\kappa$ B activation is essential for IL-1 $\beta$ -induced cell death. Inactivation of NF- $\kappa$ B increased the susceptibility to IL-1 $\beta$ -induced hepatocyte cell death. NF- $\kappa$ B activation in hepatocytes was inhibited by adenovirus expressing I $\kappa$ B-super-repressor (I $\kappa$ B-sr). Cell death (A), ALT (B), and LDH (C) levels were examined (n = 4, each group).

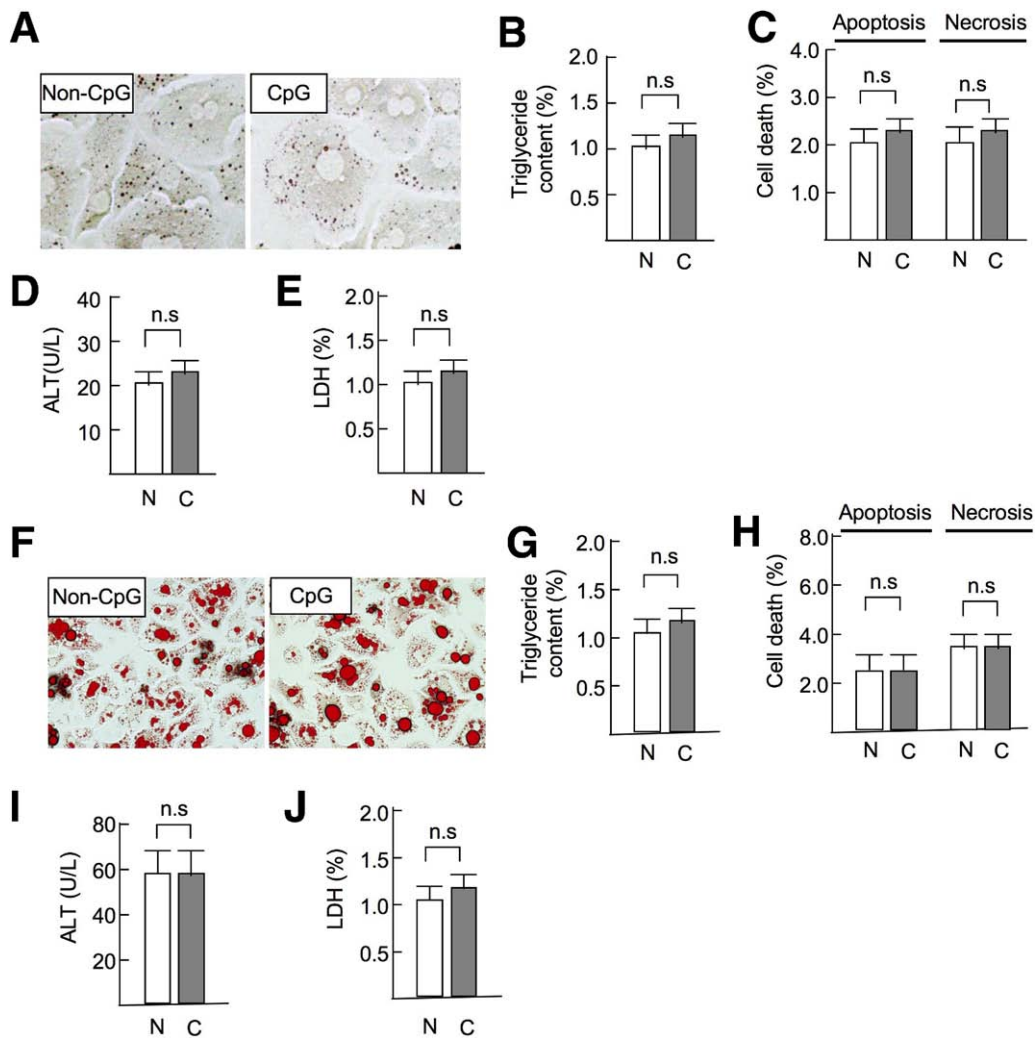

**Supplementary Figure 5.** An effect of CpG-ODN on hepatocytes. A CpG-ODN induced neither lipid accumulation nor cell death in both normal hepatocyte (A–E) and lipid-accumulated hepatocytes (F–J). Hepatocytes were treated with 5  $\mu$ g/mL CpG-ODN (C) or non-CpG-ODN (N) for 24 hours. (A and F) Oil Red O staining, (B and G) triglyceride content in hepatocytes, (C and H) cell death, (D and I) ALT, and (E and J) LDH levels in supernatant are shown (n = 4, each group). Original magnification,  $\times 400$  (A),  $\times 200$  (F).

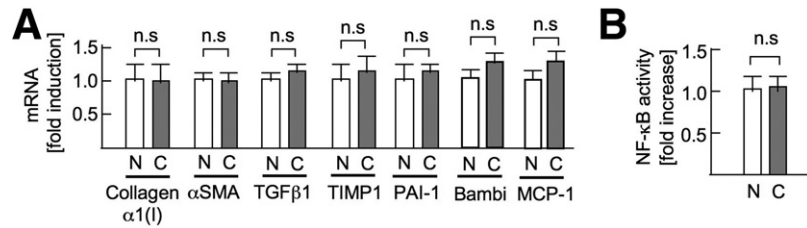

**Supplementary Figure 6.** HSCs are not activated by TLR9 ligand. (A and B) WT stellate cells were treated with 5  $\mu$ g/mL CpG-ODN (C) or non-CpG-ODN (N) for 8 hours followed by measurement of mRNA expression of profibrogenic markers by quantitative real-time PCR. (B) NF- $\kappa$ B activity in response to IL-1 $\beta$  was examined by the infection of adenovirus expressing NF- $\kappa$ B-driven luciferase. n.s., not significant.

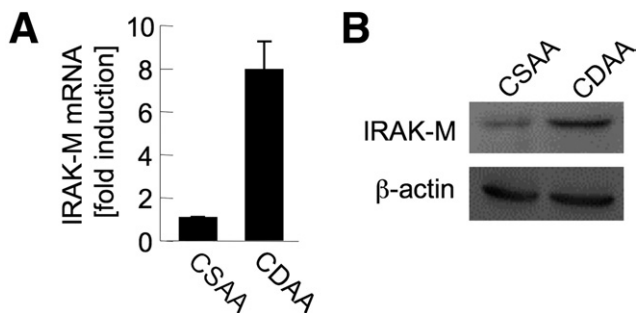

**Supplementary Figure 7.** Strong IRAK-M expression in hepatocytes isolated from the CDAA diet. (A and B) Hepatocytes were isolated from WT mice fed a CSAA or CDAA diet for 22 weeks. (A) IRAK-M mRNA expression was determined by quantitative real-time PCR. (B) Immunoblots of IRAK-M are shown. Significant up-regulation of IRAK-M expression in hepatocytes from mice fed the CDAA diet was observed.
